# Supplementary material for: Studies of structural diversity due to inter-/intra-molecular hydrogen bonding and photoluminescent properties in thiocarboxylate Cu(i) and Ag(i) complexes
Source: Royal Society of Chemistry journal article supplement (doi:10.1039/c4ra07883g), 2014-01-01
Supplement: c4ra07883g1.pdf [file c4ra07883g1.pdf]

Supporting informations for the manuscript

**Studies of structural diversity due to inter-/intra-molecular hydrogen bonding and photoluminescent properties in thiocarboxylate Cu(I) and Ag(I) complexes**

**Suryabhan Singh<sup>a\*</sup> and Subrato Bhattacharya<sup>a\*</sup>**

<sup>a</sup> *Department of Chemistry, Faculty of Science, Banaras Hindu University, Varanasi-221005, India. Fax: +91-542-2368127; Tel: +91-542-6702451; E-mail:*

*sbs.bhu@gmail.com (S.S.) bhatt99@yahoo.com (S.B.)*

**Table S1** Crystal data and structure refinement of complexes

|                                     | 1                                                                               | 2                                                                 | 3                                                                               | 4                                                                              | 5                                                                              | 6                                                                                                           | 7                                                                                             | 8                                                                                             | 9                                                                                                             |
|-------------------------------------|---------------------------------------------------------------------------------|-------------------------------------------------------------------|---------------------------------------------------------------------------------|--------------------------------------------------------------------------------|--------------------------------------------------------------------------------|-------------------------------------------------------------------------------------------------------------|-----------------------------------------------------------------------------------------------|-----------------------------------------------------------------------------------------------|---------------------------------------------------------------------------------------------------------------|
| <b>Empirical formula</b>            | C <sub>45</sub> H <sub>39</sub> CuN <sub>2</sub> OP <sub>2</sub> S <sub>2</sub> | C <sub>29</sub> H <sub>28</sub> CuN <sub>2</sub> OPS <sub>6</sub> | C <sub>48</sub> H <sub>39</sub> CuN <sub>2</sub> OP <sub>2</sub> S <sub>3</sub> | C <sub>46</sub> H <sub>37</sub> CuO <sub>3</sub> P <sub>2</sub> S <sub>3</sub> | C <sub>48</sub> H <sub>39</sub> CuO <sub>2</sub> P <sub>2</sub> S <sub>3</sub> | C <sub>57</sub> H <sub>46</sub> Cu <sub>2</sub> N <sub>2</sub> O <sub>2</sub> P <sub>2</sub> S <sub>3</sub> | C <sub>48</sub> H <sub>40</sub> Cu <sub>4</sub> N <sub>4</sub> O <sub>4</sub> S <sub>12</sub> | C <sub>96</sub> H <sub>83</sub> Ag <sub>2</sub> NO <sub>2</sub> P <sub>4</sub> S <sub>4</sub> | C <sub>215</sub> H <sub>181</sub> Ag <sub>4</sub> N <sub>8</sub> O <sub>4</sub> P <sub>8</sub> S <sub>8</sub> |
| <b>T/K</b>                          | 293(2)                                                                          | 293(2)                                                            | 293(2)                                                                          | 293(2)                                                                         | 293(2)                                                                         | 293(2)                                                                                                      | 293(2)                                                                                        | 293(2)                                                                                        | 293(2)                                                                                                        |
| <b>Crystal System</b>               | Orthorhombic                                                                    | Triclinic                                                         | Monoclinic                                                                      | Orthorhombic                                                                   | Orthorhombic                                                                   | Triclinic                                                                                                   | Triclinic                                                                                     | Monoclinic                                                                                    | Triclinic                                                                                                     |
| <b>Space Group</b>                  | <i>P</i> 2 <sub>1</sub> 2 <sub>1</sub>                                          | <i>P</i> -1                                                       | <i>P</i> 2 <sub>1</sub> / <i>c</i>                                              | <i>P</i> 2 <sub>1</sub> 2 <sub>1</sub>                                         | <i>P</i> 2 <sub>1</sub> 2 <sub>1</sub>                                         | <i>P</i> -1                                                                                                 | <i>P</i> -1                                                                                   | <i>P</i> 2 <sub>1</sub>                                                                       | <i>P</i> -1                                                                                                   |
| <b>a/Å</b>                          | 12.6998(7)                                                                      | 10.0157(12)                                                       | 13.2247(4)                                                                      | 13.094(5)                                                                      | 13.1995(11)                                                                    | 12.834(8)                                                                                                   | 8.553(5)                                                                                      | 10.3842(5)                                                                                    | 18.1036(6)                                                                                                    |
| <b>b/Å</b>                          | 13.0818(8)                                                                      | 10.0218(12)                                                       | 19.1038(6)                                                                      | 17.908(5)                                                                      | 18.078(3)                                                                      | 14.770(9)                                                                                                   | 11.605(5)                                                                                     | 18.0770(10)                                                                                   | 19.7740(8)                                                                                                    |
| <b>c/Å</b>                          | 24.7253(13)                                                                     | 18.170(2)                                                         | 18.0282(6)                                                                      | 18.120(5)                                                                      | 18.115(3)                                                                      | 15.900(11)                                                                                                  | 14.138(5)                                                                                     | 23.1444(11)                                                                                   | 27.1081(9)                                                                                                    |
| <b>α°</b>                           | 90                                                                              | 77.489(11)                                                        | 90                                                                              | 90                                                                             | 90                                                                             | 65.78(6)                                                                                                    | 82.590(5)                                                                                     | 90                                                                                            | 89.880(3)                                                                                                     |
| <b>β°</b>                           | 90                                                                              | 79.640(11)                                                        | 108.708(4)                                                                      | 90                                                                             | 90                                                                             | 87.90(6)                                                                                                    | 83.221(5)                                                                                     | 101.813(5)                                                                                    | 88.550(3)                                                                                                     |
| <b>γ°</b>                           | 90                                                                              | 66.284(12)                                                        | 90                                                                              | 90                                                                             | 90                                                                             | 69.10(6)                                                                                                    | 86.617(5)                                                                                     | 90                                                                                            | 79.127(3)                                                                                                     |
| <b>V/Å<sup>3</sup></b>              | 4107.8(4)                                                                       | 1621.3(3)                                                         | 4314.0(2)                                                                       | 4249(2)                                                                        | 4322.7(11)                                                                     | 2546(3)                                                                                                     | 1380.5(11)                                                                                    | 4252.5(4)                                                                                     | 9526.9(6)                                                                                                     |
| <b>Z</b>                            | 4                                                                               | 2                                                                 | 4                                                                               | 4                                                                              | 4                                                                              | 2                                                                                                           | 1                                                                                             | 2                                                                                             | 2                                                                                                             |
| <b>μ(Mo–Kα)/mm<sup>-1</sup></b>     | 0.748                                                                           | 1.135                                                             | 0.764                                                                           | 0.776                                                                          | 0.769                                                                          | 1.065                                                                                                       | 2.020                                                                                         | 0.683                                                                                         | 0.618                                                                                                         |
| <b>Reflections Collected/unique</b> | 15721/8505                                                                      | 20905/10588                                                       | 21407/9839                                                                      | 13726/8994                                                                     | 11262 / 7191                                                                   | 21231/11646                                                                                                 | 10987/6259                                                                                    | 26033/16336                                                                                   | 82017/42830                                                                                                   |
| <b>R (int)</b>                      | 0.0326                                                                          | 0.0494                                                            | 0.0286                                                                          | 0.0291                                                                         | 0.0597                                                                         | 0.0471                                                                                                      | 0.0553                                                                                        | 0.0259                                                                                        | 0.0687                                                                                                        |
| <b>Final R indices</b>              | R1 = 0.0721                                                                     | R1 = 0.0660                                                       | R1 = 0.0604                                                                     | R1 = 0.0556                                                                    | R1 = 0.0883                                                                    | R1 = 0.0632                                                                                                 | R1 = 0.0680                                                                                   | R1 = 0.0416                                                                                   | R1 = 0.1361                                                                                                   |
| <b>[I&gt;2σ(I)]</b>                 | wR2 = 0.1770                                                                    | wR2 = 0.1319                                                      | wR2 = 0.1338                                                                    | wR2 = 0.1287                                                                   | wR2 = 0.2207                                                                   | wR2 = 0.1221                                                                                                | wR2 = 0.1211                                                                                  | wR2 = 0.0763                                                                                  | wR2 = 0.3479                                                                                                  |
| <b>R indices (all data)</b>         | R1 = 0.1115                                                                     | R1 = 0.1302                                                       | R1 = 0.1002                                                                     | R1 = 0.0807                                                                    | R1 = 0.1331                                                                    | R1 = 0.1358                                                                                                 | R1 = 0.1532                                                                                   | R1 = 0.0591                                                                                   | R1 = 0.2115                                                                                                   |
|                                     | wR2 = 0.2020                                                                    | wR2 = 0.1757                                                      | wR2 = 0.1591                                                                    | wR2 = 0.1469                                                                   | wR2 = 0.2916                                                                   | wR2 = 0.1588                                                                                                | wR2 = 0.1626                                                                                  | wR2 = 0.0833                                                                                  | wR2 = 0.4016                                                                                                  |
| <b>GOF on F2</b>                    | 1.038                                                                           | 1.041                                                             | 1.010                                                                           | 1.001                                                                          | 1.049                                                                          | 1.015                                                                                                       | 0.984                                                                                         | 1.017                                                                                         | 1.014                                                                                                         |

**Table S2** Selected bond lengths and bond angles

| <b>Complex</b> | <b>Bond lengths (in Å)</b> |            | <b>Bond angles (in °)</b> |            |            |
|----------------|----------------------------|------------|---------------------------|------------|------------|
| <b>1</b>       | Cu1-P1                     | 2.3057(18) | P1-Cu1-P2                 | 113.81(6)  |            |
|                | Cu1-P2                     | 2.3165(17) | P1-Cu1-S1                 | 122.34(7)  |            |
|                | Cu1-S1                     | 2.365(2)   | P2-Cu1-S1                 | 98.30(7)   |            |
|                | Cu1-S2                     | 2.3903(17) | P1-Cu1-S2                 | 106.35(7)  |            |
|                | S1-C1                      | 1.709(9)   | P2-Cu1-S2                 | 97.94(6)   |            |
|                | S2-C3                      | 1.674(7)   | S1-Cu1-S2                 | 115.34(8)  |            |
|                | O1-C1                      | 1.240(10)  |                           |            |            |
|                | N1-C3                      | 1.359(7)   |                           |            |            |
|                | N2-C3                      | 1.331(8)   |                           |            |            |
|                | <b>2</b>                   | Cu1-S1     | 2.2905(11)                | S1-Cu1-P1  | 110.76(4)  |
| Cu1-P1         |                            | 2.2924(10) | S1-Cu1-S5                 | 121.52(4)  |            |
| Cu1-S5         |                            | 2.3817(12) | P1-Cu1-S5                 | 100.77(4)  |            |
| Cu1-S3         |                            | 2.3942(11) | S1-Cu1-S3                 | 116.59(4)  |            |
| S1-C1          |                            | 1.716(3)   | P1-Cu1-S3                 | 97.30(4)   |            |
| S3-C6          |                            | 1.673(4)   | S5-Cu1-S3                 | 106.13(4)  |            |
| S5-C9          |                            | 1.674(4)   |                           |            |            |
| O1-C1          |                            | 1.252(4)   |                           |            |            |
| N1-C6          |                            | 1.297(5)   |                           |            |            |
| N2-C9          |                            | 1.308(5)   |                           |            |            |
| <b>3</b>       | Cu1-P2                     | 2.2870(11) | P2 Cu1 P1                 | 124.13(4)  |            |
|                | Cu1-P1                     | 2.2895(10) | P2-Cu1-S1                 | 115.36(4)  |            |
|                | Cu1-S1                     | 2.3506(11) | P1-Cu1-S1                 | 108.04(4)  |            |
|                | Cu1-S2                     | 2.3923(11) | P2-Cu1-S2                 | 101.97(4)  |            |
|                | S1-C1                      | 1.735(4)   | P1-Cu1-S2                 | 100.37(4)  |            |
|                | S2-C6                      | 1.684(4)   | S1-Cu1-S2                 | 103.35(4)  |            |
|                | O1-C1                      | 1.221(5)   |                           |            |            |
|                | N1-C6                      | 1.349(5)   |                           |            |            |
|                | N2-C6                      | 1.342(5)   |                           |            |            |
|                | <b>4</b>                   | Cu1-P1     | 2.2738(13)                | P1-Cu1-P2  | 120.95(5)  |
| Cu1-P2         |                            | 2.2910(15) | P1-Cu1-S2                 | 99.85(5)   |            |
| Cu1-S2         |                            | 2.3245(13) | P2-Cu1-S2                 | 105.57(5)  |            |
| Cu1-S1         |                            | 2.3564(14) | P1-Cu1-S1                 | 111.05(5)  |            |
| S2-C6          |                            | 1.688(5)   | P2-Cu1-S1                 | 100.12(5)  |            |
| S1-C1          |                            | 1.673(5)   | S2-Cu1-S1                 | 120.55(5)  |            |
| O1-C1          |                            | 1.280(7)   |                           |            |            |
| O2-C6          |                            | 1.274(6)   |                           |            |            |
| <b>5</b>       |                            | Cu1-P1     | 2.268(3)                  | P1-Cu1-P2  | 121.15(10) |
|                |                            | Cu1-P2     | 2.291(2)                  | P1-Cu1-S1  | 100.32(11) |
|                | Cu1-S1                     | 2.324(2)   | P2-Cu1-S1                 | 105.66(8)  |            |
|                | Cu1-S2                     | 2.343(3)   | P1-Cu1-S2                 | 110.74(10) |            |
|                | S2-C6                      | 1.670(11)  | P2-Cu1-S2                 | 100.23(11) |            |
|                | S1-C1                      | 1.662(9)   | S1-Cu1-S2                 | 119.95(11) |            |
|                | O1-C1                      | 1.259(12)  |                           |            |            |
|                | O2-C6                      | 1.312(11)  |                           |            |            |
|                | <b>6</b>                   | Cu2-Cu1    | 2.7180(18)                | P1-Cu1-S1  | 117.28(7)  |
|                |                            | Cu1-P1     | 2.230(2)                  | P1-Cu1-S2  | 111.65(8)  |
| Cu1-S1         |                            | 2.249(2)   | S1-Cu1-S2                 | 107.46(7)  |            |
| Cu1-S2         |                            | 2.4425(19) | P1-Cu1-S3                 | 115.45(8)  |            |
| Cu1-S3         |                            | 2.451(3)   | S1-Cu1-S3                 | 99.92(9)   |            |
| Cu2-O1         |                            | 2.129(3)   | S2-Cu1-S3                 | 103.62(8)  |            |
| Cu2-P2         |                            | 2.242(2)   | O1-Cu2-P2                 | 108.87(11) |            |
| Cu2-S2         |                            | 2.315(3)   | O1-Cu2-S2                 | 101.89(12) |            |
| Cu2-S3         |                            | 2.431(2)   | P2-Cu2-S2                 | 127.71(7)  |            |
| S3-C15         |                            | 1.695(5)   | O1-Cu2-S3                 | 96.50(11)  |            |
| S2-C8          | 1.732(5)                   | P2-Cu2-S3  | 109.00(9)                 |            |            |
| S1-C1          | 1.702(5)                   | S2-Cu2-S3  | 108.24(8)                 |            |            |

|   |          |            |             |            |
|---|----------|------------|-------------|------------|
|   | O2-C8    | 1.242(5)   |             |            |
|   | O1-C1    | 1.254(5)   |             |            |
|   | N1-C15   | 1.324(6)   |             |            |
|   | N2-C15   | 1.348(5)   |             |            |
| 7 | Cu1-S2   | 2.265(2)   | S2-Cu1-S1   | 121.76(7)  |
|   | Cu1-S1   | 2.2898(19) | S2-Cu1-S3   | 113.70(7)  |
|   | Cu1-S3   | 2.292(2)   | S1-Cu1-S3   | 124.52(7)  |
|   | Cu1-Cu2  | 2.5988(14) | S2-Cu1-Cu2  | 163.13(6)  |
|   | Cu1-Cu1' | 2.987(2)   | S1-Cu1-Cu2  | 57.67(5)   |
|   | Cu2-S5   | 2.254(2)   | S3-Cu1-Cu2  | 69.85(6)   |
|   | Cu2-S2   | 2.267(2)   | S2-Cu1-Cu1  | 87.17(6)   |
|   | Cu2-S1   | 2.3733(19) | S1-Cu1-Cu1  | 90.98(6)   |
|   | S2-Cu2'  | 2.267(2)   | S3-Cu1-Cu1  | 93.03(6)   |
|   | S1-C1    | 1.764(6)   | Cu2-Cu1-Cu1 | 76.07(5)   |
|   | S2-C8    | 1.776(6)   | S5-Cu2-S2   | 134.05(8)  |
|   | S3-C15   | 1.669(7)   | S5-Cu2-S1   | 111.47(7)  |
|   | S5-C18   | 1.669(7)   | S2-Cu2-S1   | 104.17(7)  |
|   | N1-C15   | 1.310(8)   | S5-Cu2-Cu1  | 126.77(7)  |
|   | N2-C18   | 1.297(8)   | S2-Cu2-Cu1  | 97.29(6)   |
|   |          |            | S1-Cu2-Cu1  | 54.62(5)   |
| 8 | Ag1-P1   | 2.5711(11) | P2-Ag1-S1   | 119.49(4)  |
|   | Ag1-P2   | 2.4963(9)  | P2-Ag1-P1   | 124.86(3)  |
|   | Ag1-S1   | 2.5363(12) | S1-Ag1-P1   | 98.07(4)   |
|   | Ag1-S2   | 2.6959(12) | P2-Ag1-S2   | 109.70(4)  |
|   | Ag2-P3   | 2.4693(11) | S1-Ag1-S2   | 111.74(4)  |
|   | Ag2-P4   | 2.4738(11) | P1-Ag1-S2   | 88.88(4)   |
|   | Ag2-S4   | 2.4812(13) | P3-Ag2-P4   | 123.61(4)  |
|   | S1-C1    | 1.712(5)   | P3-Ag2-S4   | 120.70(4)  |
|   | S2-C8    | 1.654(5)   | P4-Ag2-S4   | 115.68(4)  |
|   | S4-C47   | 1.705(6)   |             |            |
|   | O1-C1    | 1.236(5)   |             |            |
|   | O2-C47   | 1.251(6)   |             |            |
|   | N1-C8    | 1.307(6)   |             |            |
| 9 | Ag1-P1   | 2.486(3)   | P1-Ag1-P2   | 121.22(11) |
|   | Ag1-P2   | 2.497(3)   | P1-Ag1-S1   | 110.81(11) |
|   | Ag1-S1   | 2.621(3)   | P2-Ag1-S1   | 114.89(12) |
|   | Ag1-S2   | 2.641(4)   | P1-Ag1-S2   | 103.02(12) |
|   | S1-C1    | 1.712(13)  | P2-Ag1-S2   | 103.33(12) |
|   | S2-C8    | 1.644(16)  | S1-Ag1-S2   | 100.01(12) |
|   | O1-C1    | 1.236(15)  |             |            |
|   | N1-C8    | 1.335(16)  |             |            |
|   | N2-C8    | 1.365(17)  |             |            |

**Table S3** Hydrogen bonding parameters

| Complex  | D-H...A   | H...A (Å) | D-H...A (°) | D...A (Å) | Symm. Op.      |
|----------|-----------|-----------|-------------|-----------|----------------|
| <b>1</b> | N2-H...O1 | 1.978     | 151.56      | 2.766     | -x, ½+y, 1.5-z |
|          | N1-H...S1 | 2.700     | 168.87      | 3.547     |                |
| <b>2</b> | N1-H...O1 | 1.930     | 170.02      | 2.793     | x, ½-y, ½+z    |
|          | N2-H...O1 | 1.950     | 168.38      | 2.818     |                |
| <b>3</b> | N2-H...O1 | 1.951     | 177.66      | 2.834     | 2-x, 1-y, 1-z  |
| <b>6</b> | N1-H...O2 | 1.953     | 170.25      | 2.697     |                |
| <b>7</b> | N2-H...S3 | 2.507     | 159.91      | 3.273     | 1-x, -y, 1-z   |
|          | N1-H...O1 | 1.991     | 155.68      | 2.740     | 1-x, -y, 1-z   |
| <b>8</b> | N2-H...O2 | 2.053     | 149.97      | 2.765     | 1+x, y, z      |
|          | N1-H...O1 | 2.067     | 153.47      | 2.796     |                |
| <b>9</b> | N1-H...S3 | 2.517     | 169.62      | 3.367     | 1+x, y, z      |
|          | N2-H...S1 | 2.580     | 140.73      | 3.290     |                |
|          | N3-H...O1 | 1.999     | 161.56      | 2.829     |                |
|          | N4-H...O2 | 1.880     | 157.57      | 2.697     |                |

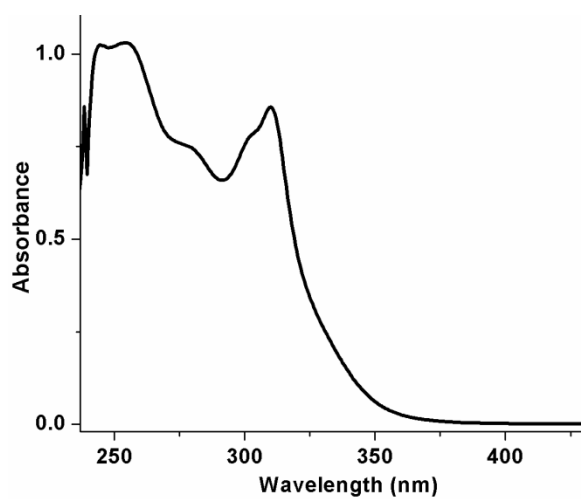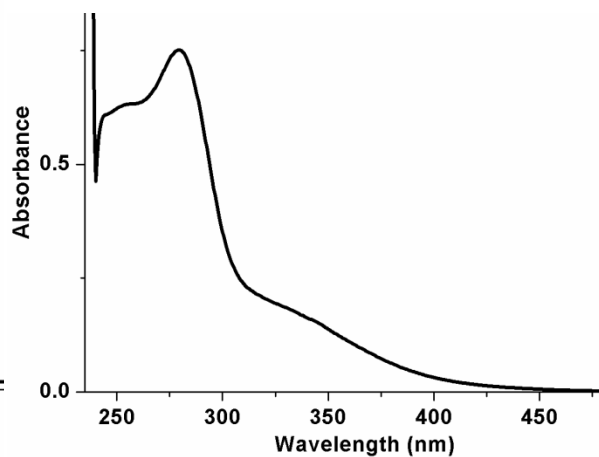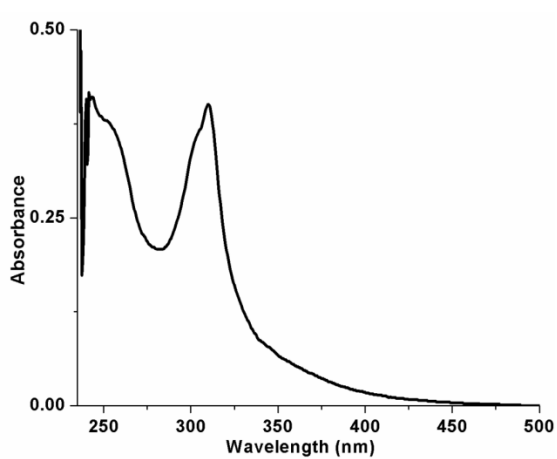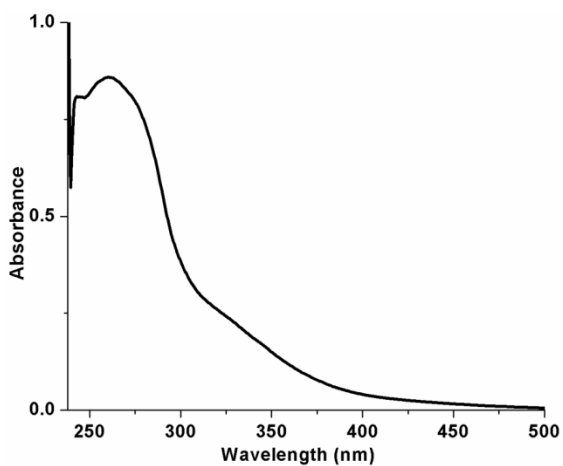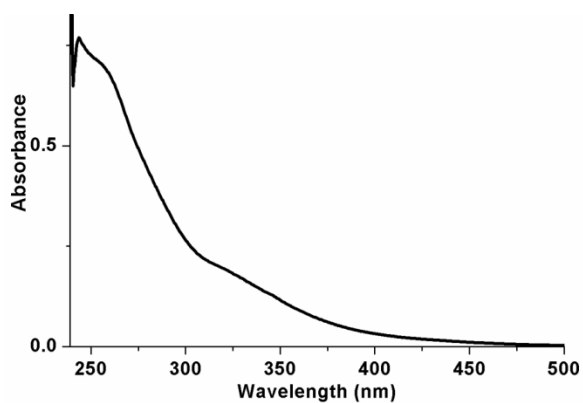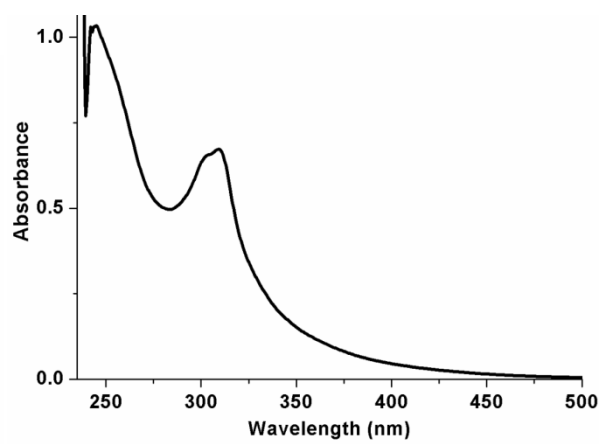

Figure S1 Absorption spectra of 1-6

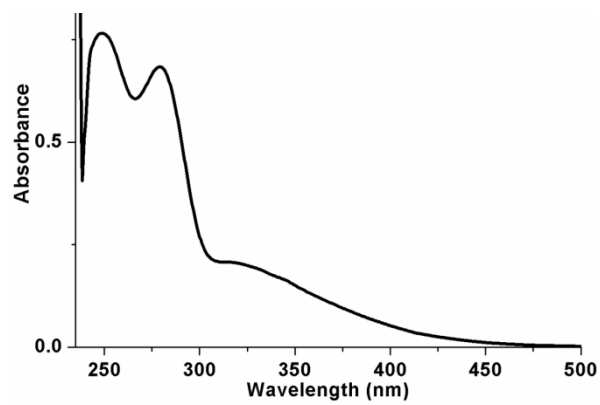

(7)

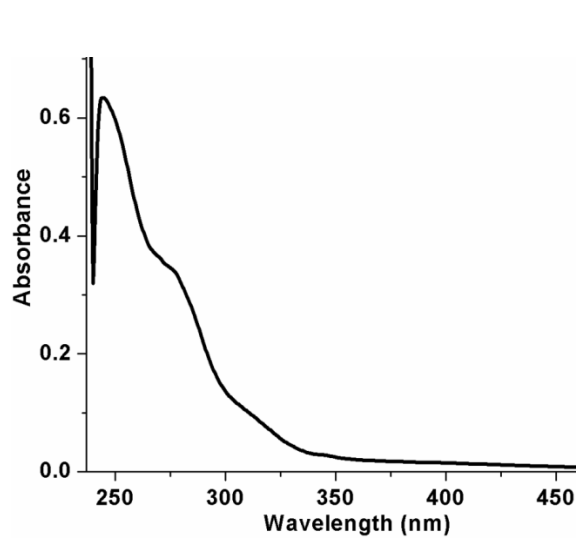

(8)

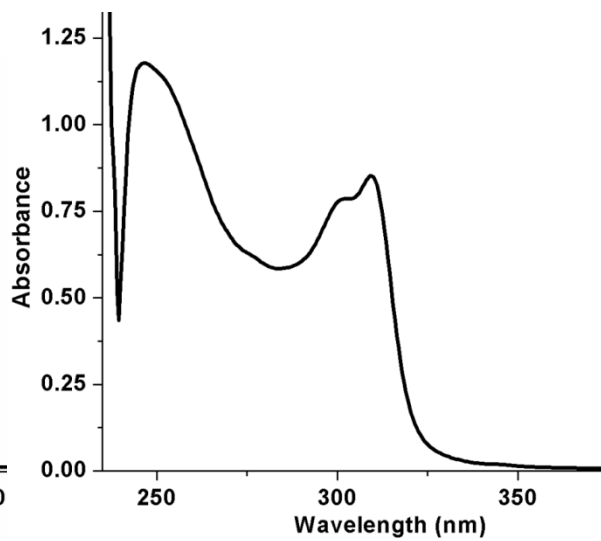

(9)

Figure S2 Absorption spectra of 7-9

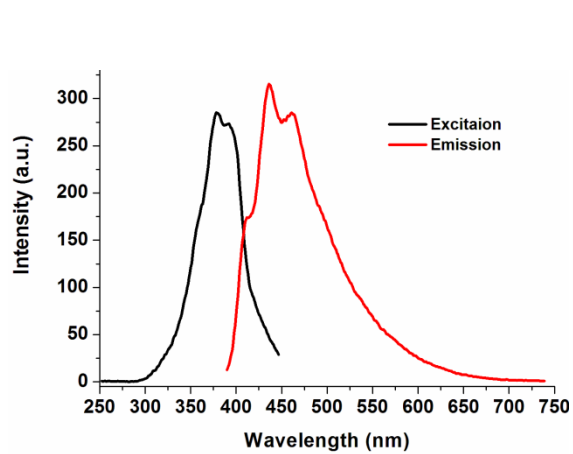

(2)

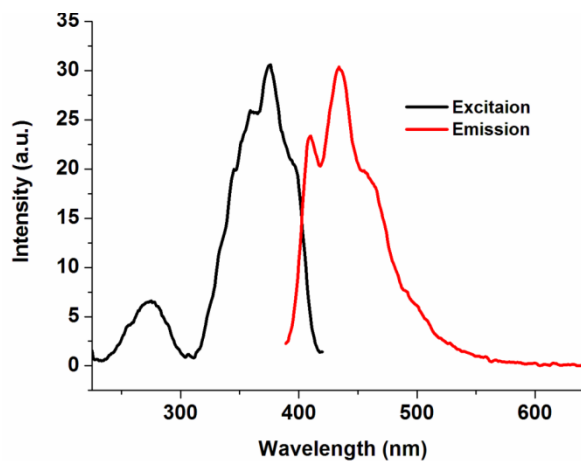

(3)

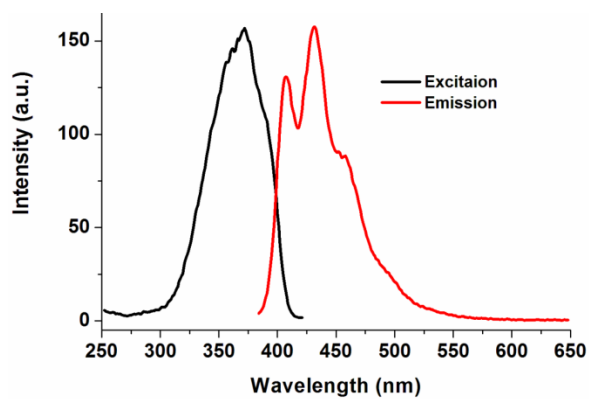

(4)

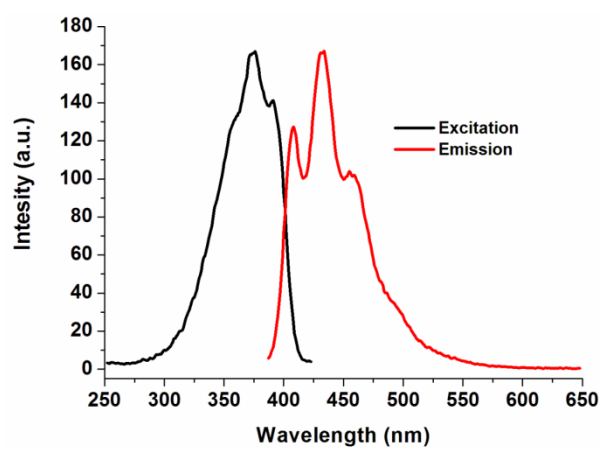

(5)

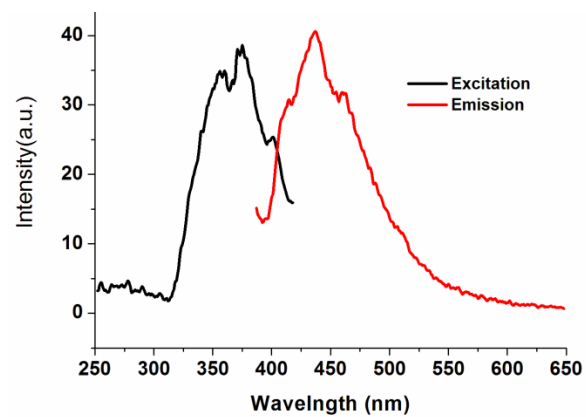

(6)

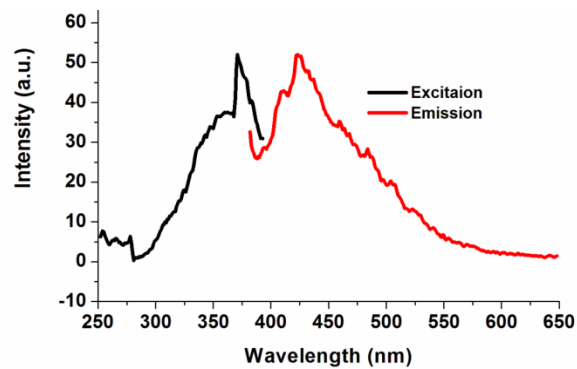

(7)

Figure S3 Excitation and Emission spectra of 2-7 in solution state



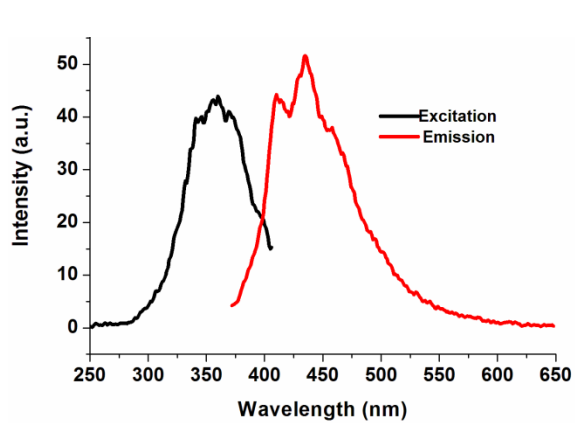

(8)

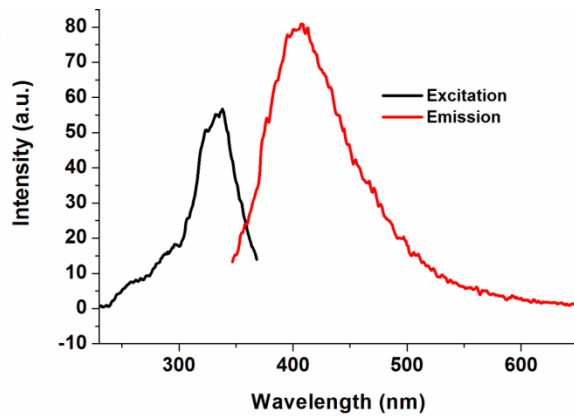

(9)

Figure S4 Excitation and Emission spectra of **8** and **9** in solution state

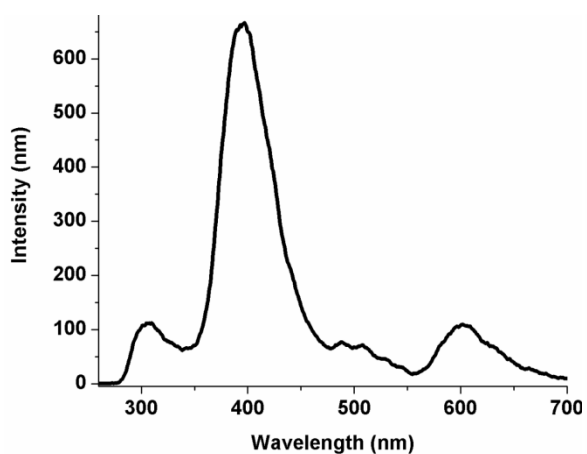

(2)

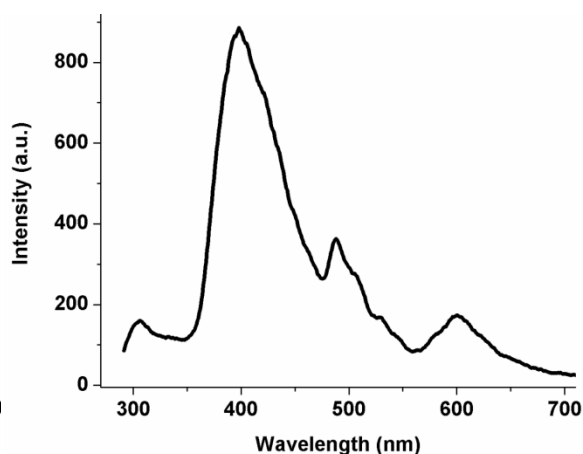

(3)

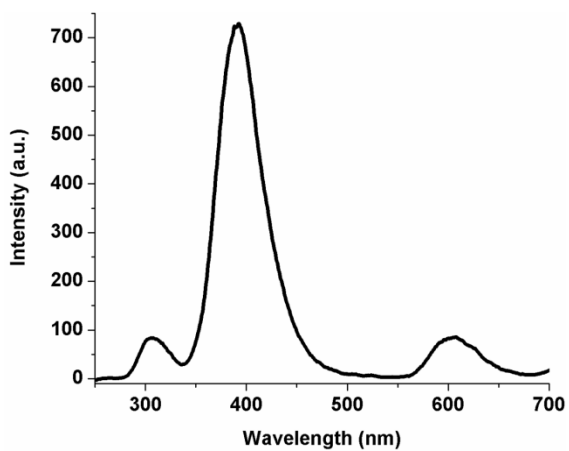

(4)

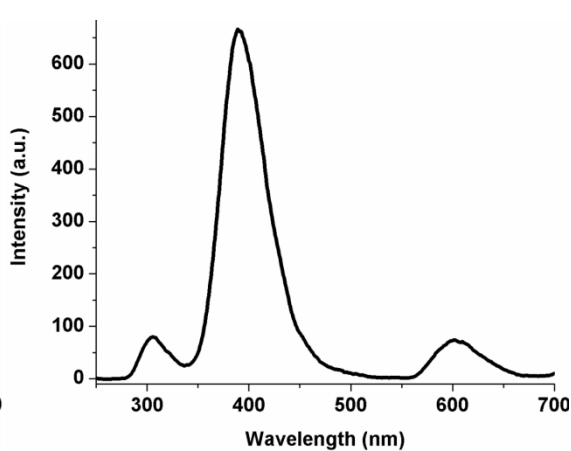

(5)

Figure S5 Emission spectrum of **2-5** in solid state

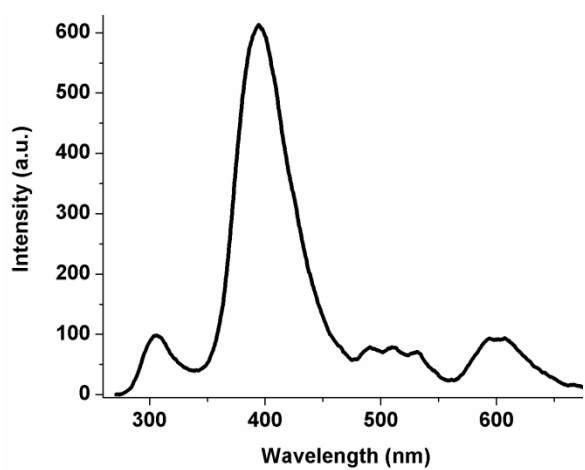

(6)

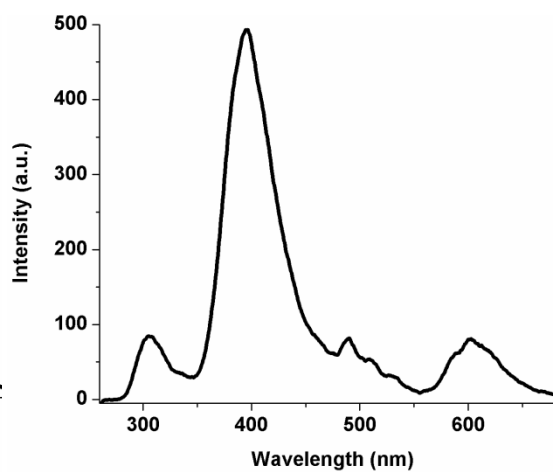

(7)

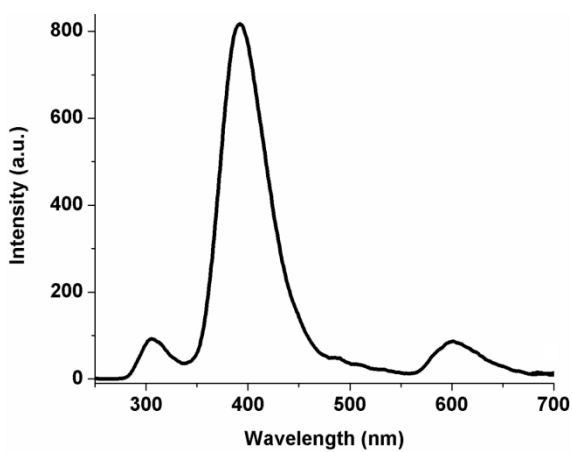

(8)

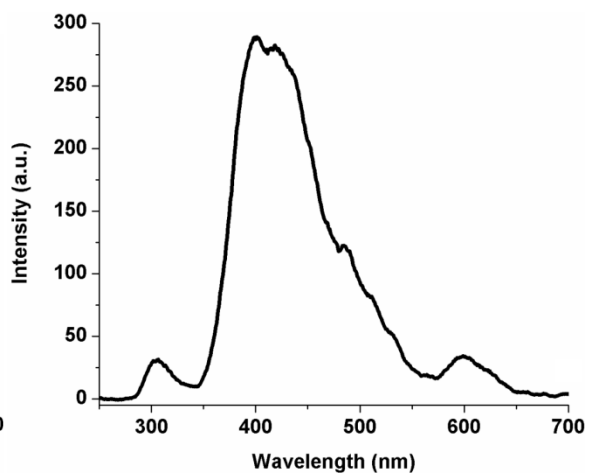

(9)

Figure S6 Emission spectrum of 6-9 in solid state
